# Supplementary material
Source: PubMed Central journal article supplement (PMC4571282)
Supplement: NIHMS715826-supplement-1.pdf [file NIHMS715826-supplement-1.pdf]

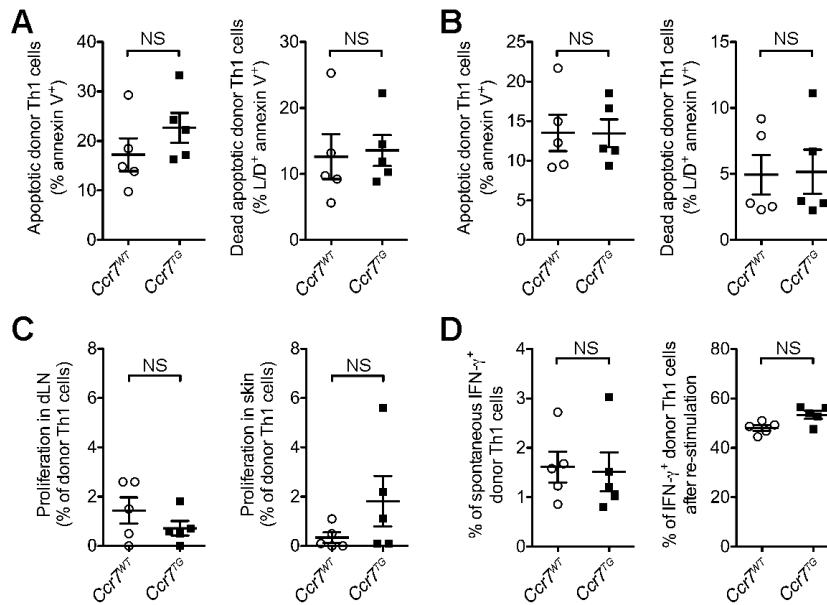

**SUPPLEMENTAL FIGURE 1.** Transgenic CCR7 expression does not influence Th1 cell apoptosis, proliferation or IFN- $\gamma$  production in short-term tissue egress assay. **(A-D)** CD45.2<sup>+</sup> *Ccr7*<sup>WT</sup> and *Ccr7*<sup>TG</sup> OTII Th1 cells were co-cultured with OVA-pulsed APCs for one hour before transfer into the footpads of two groups of CD45.1<sup>+</sup> congenic WT recipients. 20 h later, lymphocytes were isolated from dLN and footpad skin. **(A and B)** Percentage of apoptotic and dead donor Th1 cells recovered from dLN **(A)** and skin **(B)** assessed by annexin V binding and LIVE/DEAD fixable dead cell staining. **(C)** Proliferation of CFSE-labeled CD45.2<sup>+</sup> donor Th1 cells from dLN and skin was measured as percent of total donor Th1 cells with diluted CFSE label. **(D)** IFN- $\gamma$  expression of donor Th1 cells from skin without stimulation (*left*) and after re-stimulation for 4 hours with PMA and ionomycin (*right*) assessed by intracellular staining. Data points depict individual recipients and the mean  $\pm$  SEM of each group. One out of 2-3 experiments with similar results analyzing 5 mice per group. NS, not significant by Mann Whitney U test.
